# Supplementary material for: Carbon-nanotube-filled catalyst-free thermoset polyurea composites towards achieving recyclability, weldability and permanent shape reconfiguration
Source: Royal Society of Chemistry journal article supplement (doi:10.1039/c9qm00246d), 2019-01-01
Supplement: c9qm00246d1.pdf [file c9qm00246d1.pdf]

## Supporting Information

### **Carbon-nanotubes-filled Catalyst-free Thermoset Polyurea Composites toward Recyclability, Weldability and Permanent Shape Reconfiguration by Multiple stimuli**

Liang Jiang, Qinfeng Liu, Yuan Lei, Yi Wang, Yuanyang Zhao, Jingxin Lei\*

*State Key Laboratory of Polymer Materials Engineering, Polymer Research Institute of Sichuan University, Chengdu 610065, China*

\*Corresponding authors.

E-mail addresses: jxlei@scu.edu.cn (J. Lei).

#### **CONTENTS:**

- 1. Synthesis and characterization of hindered secondary amine**
- 2. Figure and caption**
- 3. Video**

## 1. Synthesis and characterization of small molecule compounds

Synthesis of the hindered amide (HDLA-100): The hindered amide was synthesized *via* the reactions between HD-100 and LA with the molar ratio of 1:3 at 25 °C under nitrogen atmosphere for 4 h and then reacted at 80 °C for 4 h. The reaction product was degassed under vacuum for 30 min. The synthesized HDLA-100 was characterized and used in subsequent syntheses.

Fourier transform infrared spectroscopy (FTIR): The structure of LA, HD-100 and HDLA-100 were characterized using an Infrared Spectrophotometer (Nicolet-560, Nicolet Co.,USA) from 4000-400  $\text{cm}^{-1}$  with a resolution setting of 4  $\text{cm}^{-1}$ . The KBr pressed disc technique (about 1 mg KBr of sample and 100 mg of KBr) was used to test the liquid samples.

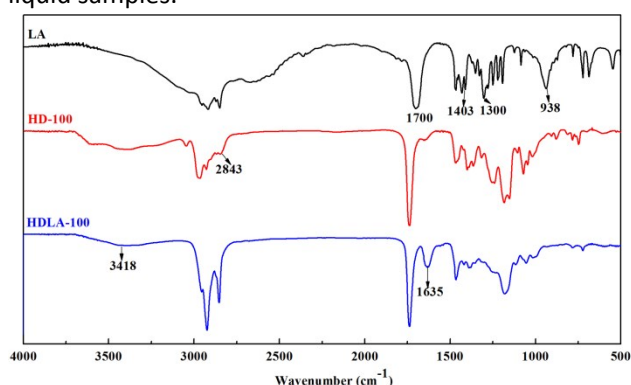

Fig. S1 FTIR spectra of LA, HD-100 and HDLA-100.

Nuclear magnetic resonance (NMR): Hydrogen nuclear magnetic resonance ( $^1\text{H}$  NMR) spectra of HDLA-100 were recorded on a Bruker Avance II-600 MHz spectrometer by utilizing  $\text{CDCl}_3$  as the solvent and tetramethylsilane (TMS) as the internal standard at ambient temperature.

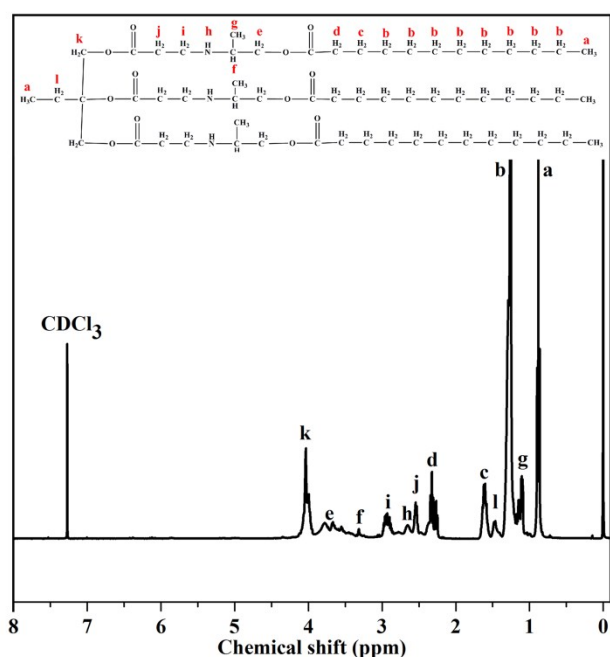

Fig. S2 1H NMR spectra of HDLA-100.

Gel Permeation Chromatography (GPC): The average molecular weight of HDLA-100 was determined by using Agilent HPLC 1200 Infinity Series. The sample of HDLA-100 was dissolved in DMF used as carrier solvent at a rate of 1 mL/min.

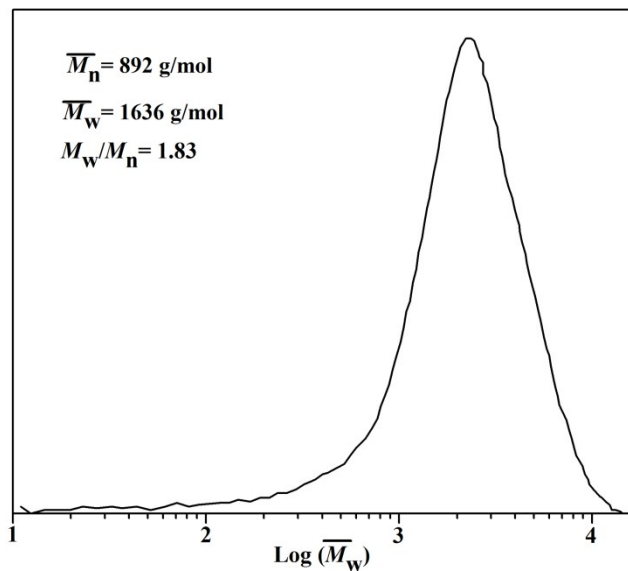

Fig. S2 The average weight of the HDLA-100.

## 2. Figure and caption

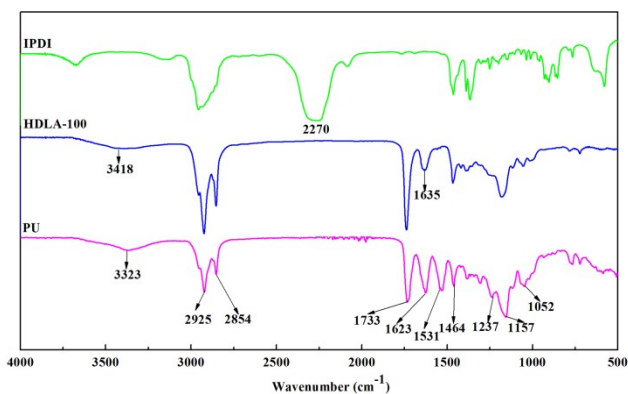

Fig. S3 FTIR spectra of IPDI, HDLA-100 and thermoset polyureas (PU).

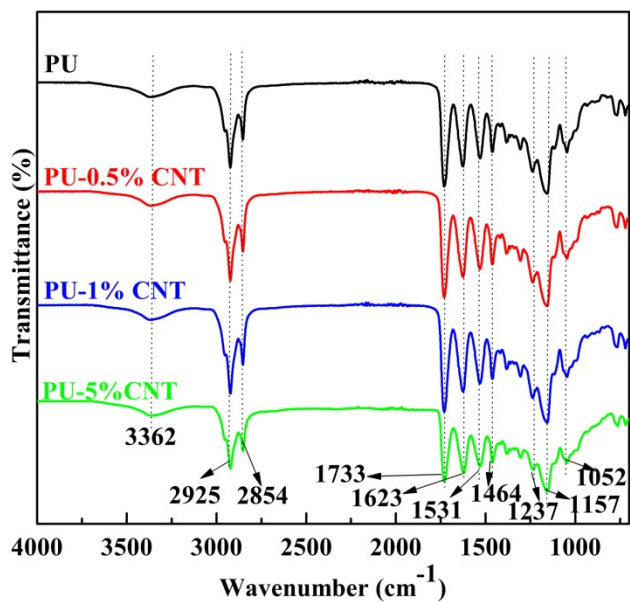

Fig. S5 FTIR spectra of thermoset PU-x % CNT composites.

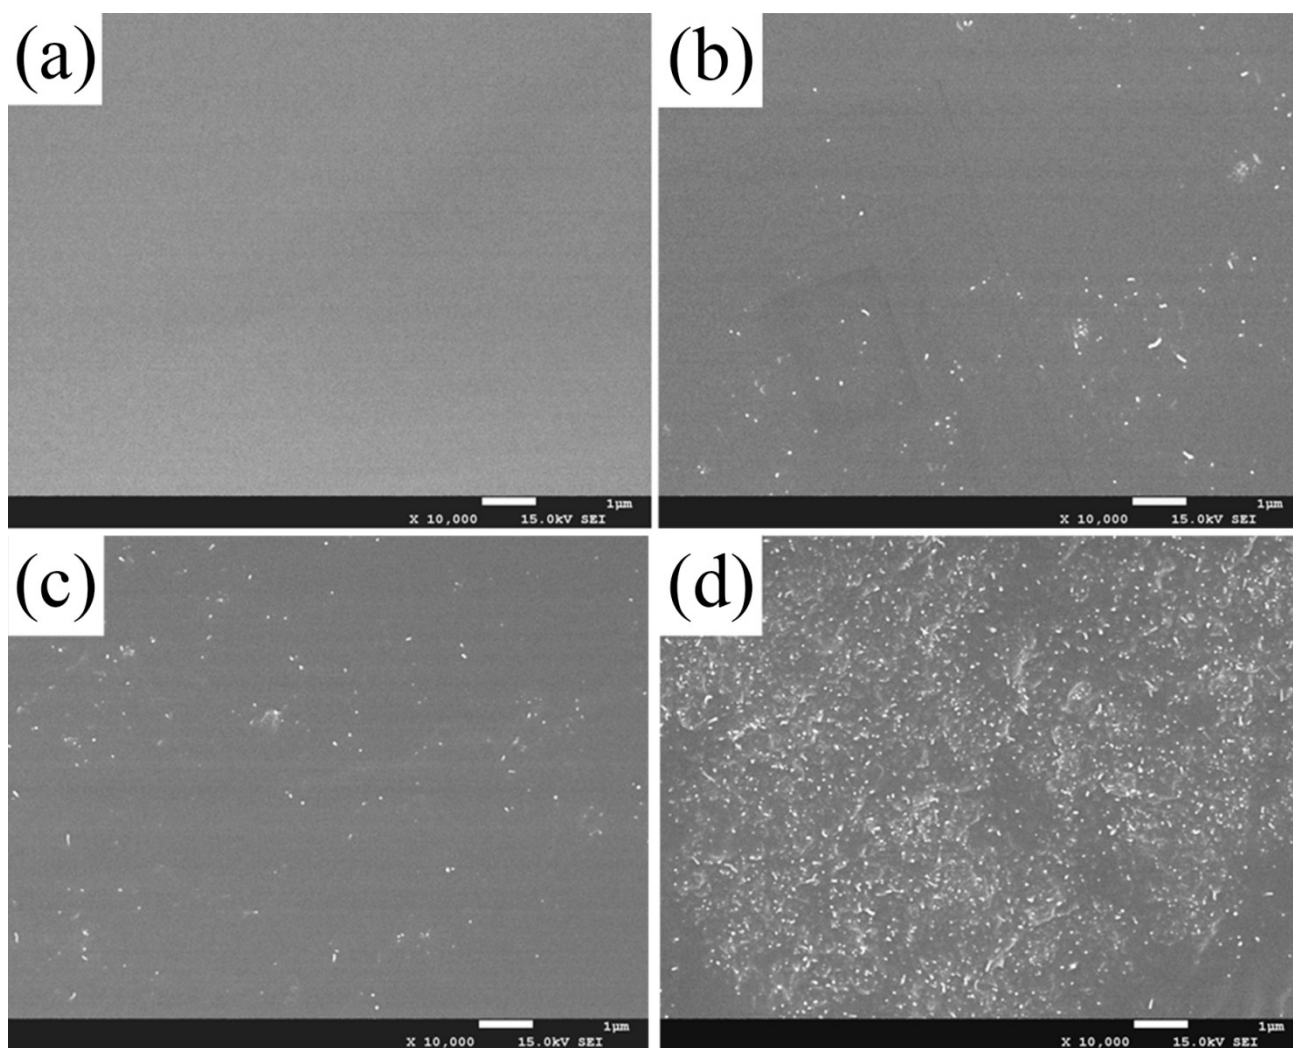

Fig. 6 Low-resolution SEM images of cryofractured surfaces for (a) PU, (b) PU-0.5% CNT, (c) PU-1% CNT, (d) PU-5%

CNT.

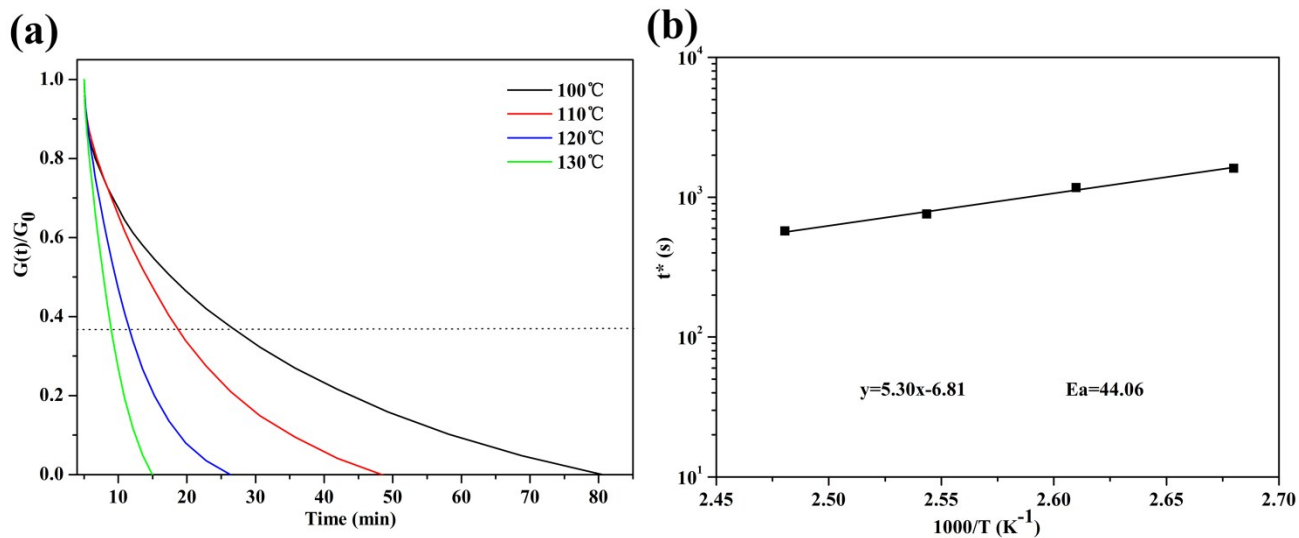

Fig. S7 (a) Stress relaxation analysis of thermoset PU-5% CNT at various temperatures. (b) Fitting of relaxation time ( $\tau$ ) to an Arrhenius equation.

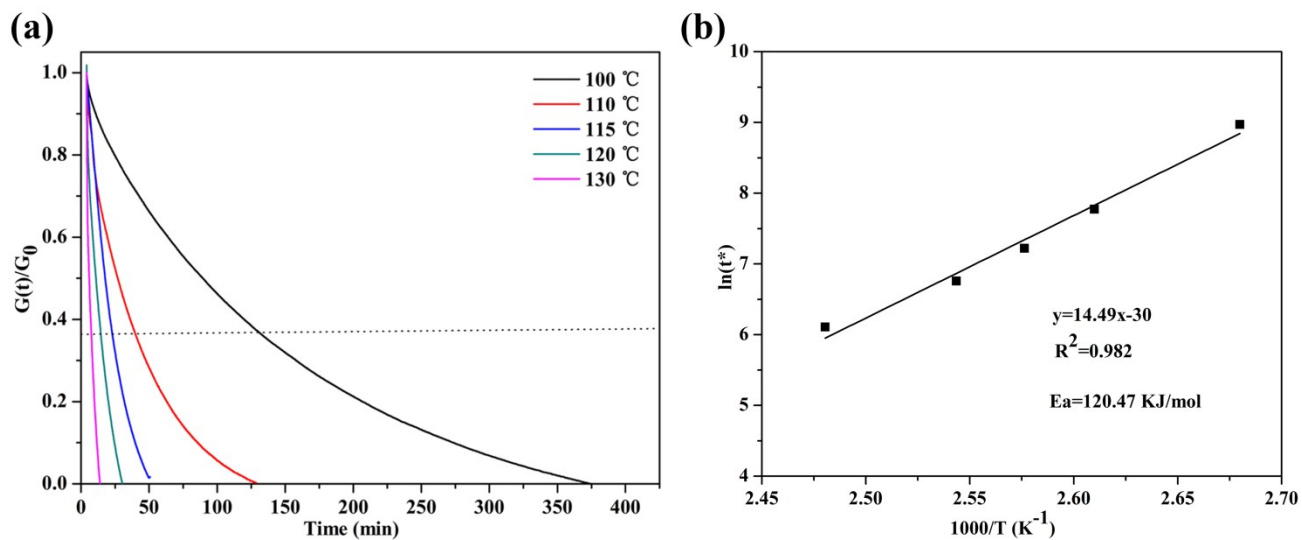

Fig. S8 (a) Stress relaxation analysis of pristine thermoset PU at various temperatures. (b) Fitting of relaxation time ( $\tau$ ) to an Arrhenius equation.

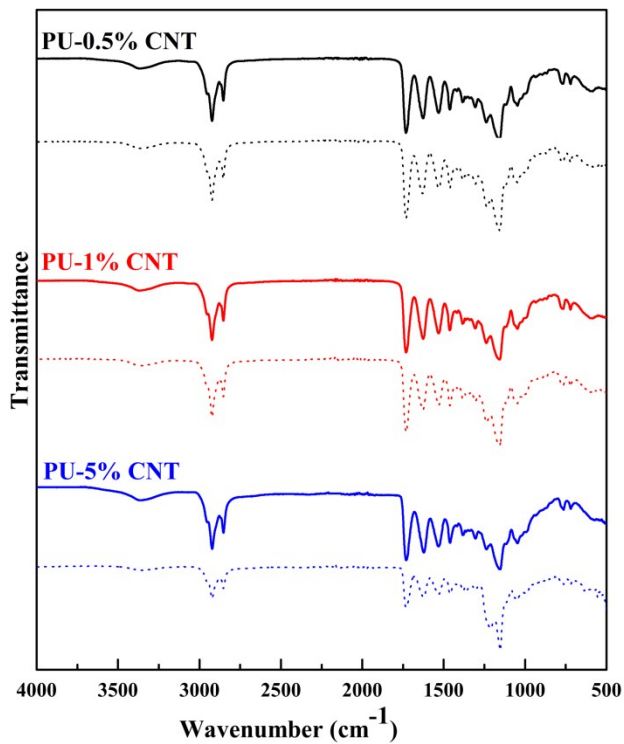

Fig. S9 FTIR spectra of original thermoset PU-x % CNT composites (solid line) and recycled thermoset PU-x % CNT composites (dash dot line).

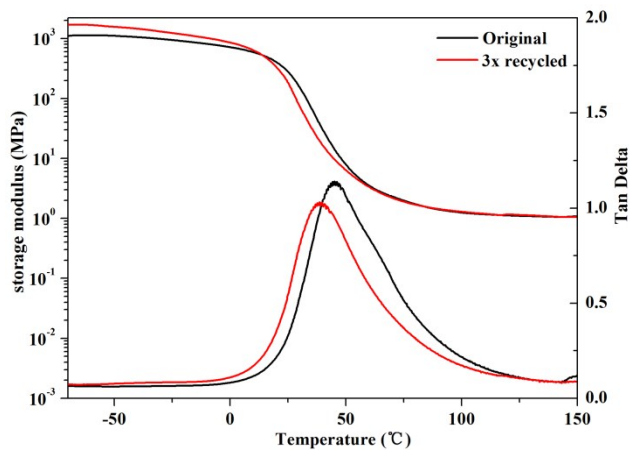

Fig. S10 Storage Modulus and tan delta curves of original thermoset PU-5 % CNT composites (black solid line) and three time recycled thermoset PU-5 % CNT composites (red solid line).

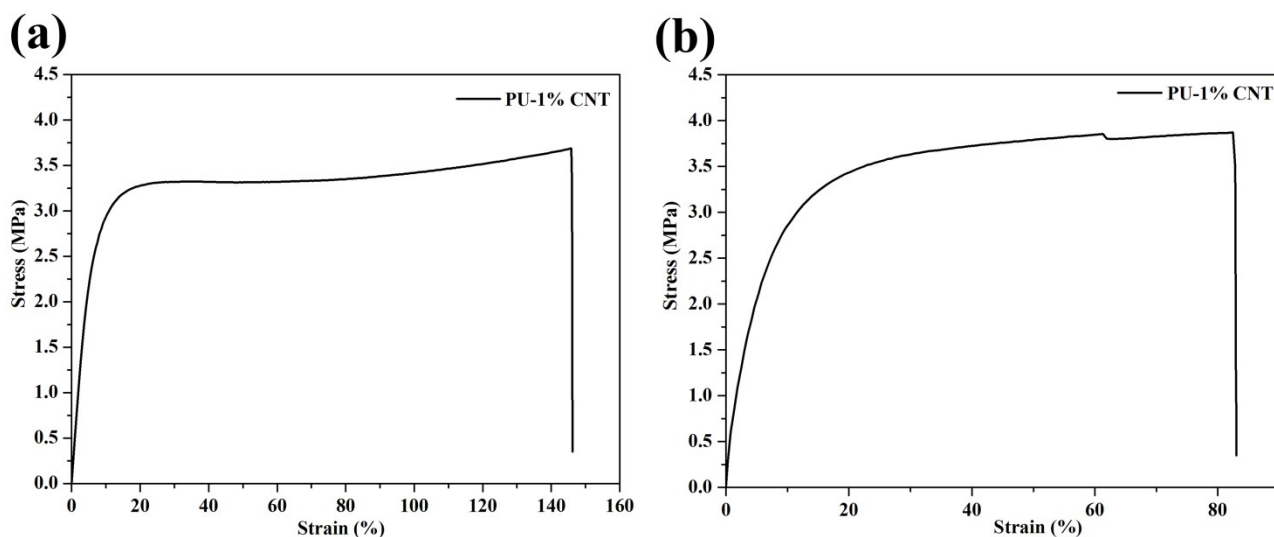

Fig. S11 Stress-strain curves of welded samples thermoset PU-1% CNT for (a) Welding at 110 °C 30 min without load, (b) Welding at IR irradiation (1.14 W cm<sup>-2</sup>) for 2 min.

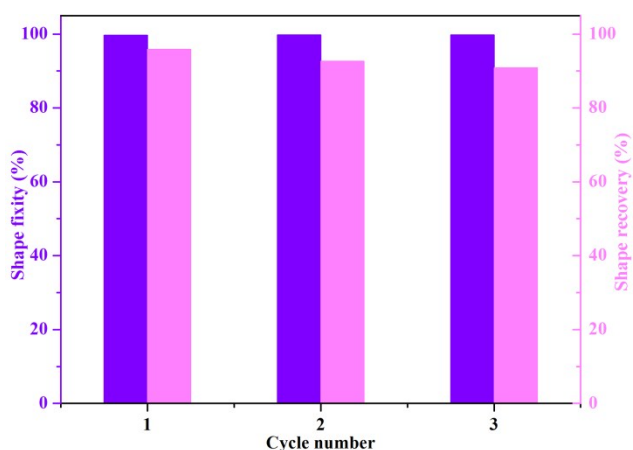

Fig. S12 Consecutive elastic shape memory cycles of the shape fixity and shape recovery.

### 3. Video

Video S1 The welded sample of PU-1% CNT loading 1 Kg weight.
